# Supplementary material for: NMR Investigation of the Interaction of Three Non-Steroidal Anti-Inflammatory Drugs with Human Serum Albumin
Source: MDPI journal article supplement (doi:10.3390/molecules27196647), 2022-10-06
Supplement: s1 [file s1]

# NMR Investigation of the Interaction of Three Non-Steroidal Anti-Inflammatory Drugs with Human Serum Albumin

Federica Aiello <sup>1,\*</sup>, Gloria Uccello-Barretta <sup>2,\*</sup>, Claudio Picchi <sup>2</sup>, Samuele Nazzi <sup>2</sup>, Alessandra Recchimurzo <sup>2</sup> and Federica Balzano <sup>2</sup>

<sup>1</sup> National Research Council, Institute for Chemical and Physical Processes (CNR-IPCF), Via G. Moruzzi, 1, 56124 Pisa, Italy

<sup>2</sup> Department of Chemistry and Industrial Chemistry, University of Pisa, Via G. Moruzzi 13, 56124 Pisa, Italy

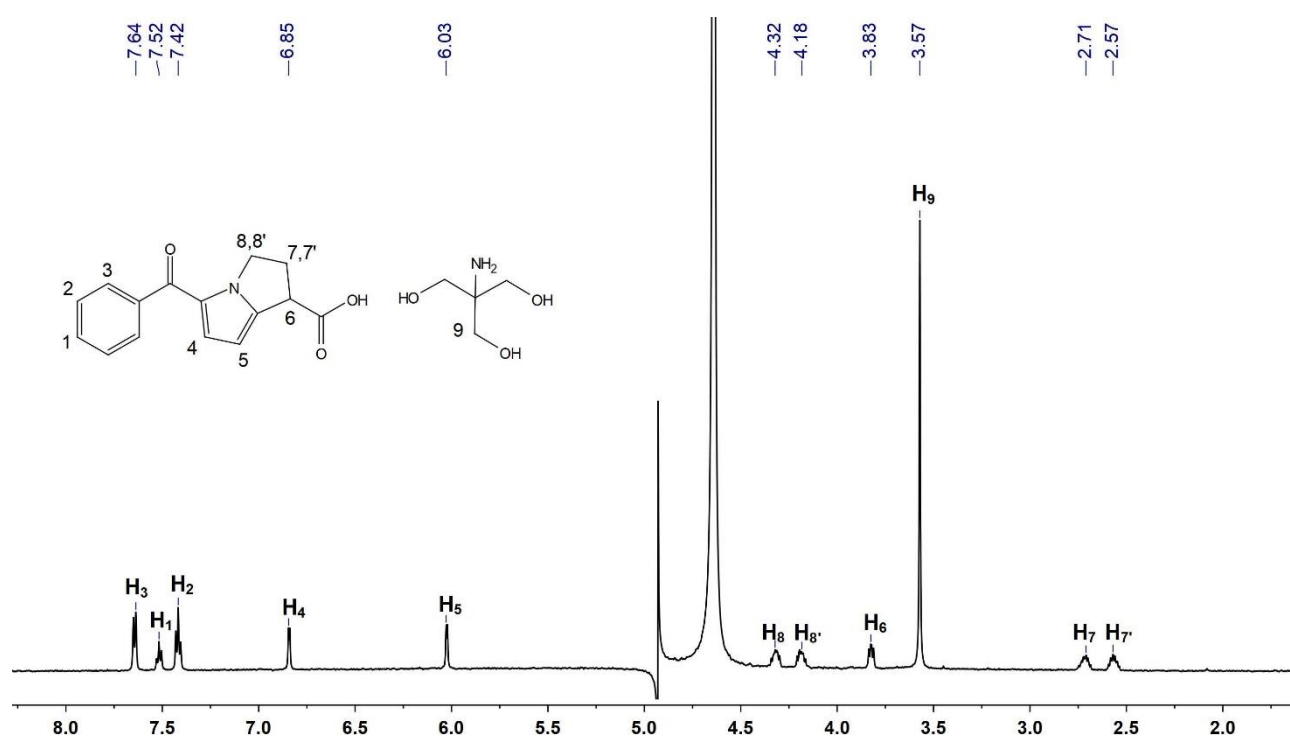

Figure S1. <sup>1</sup>H NMR (600 MHz, D<sub>2</sub>O, pH 7.4, 298 K) spectrum of KTR (2 mM).

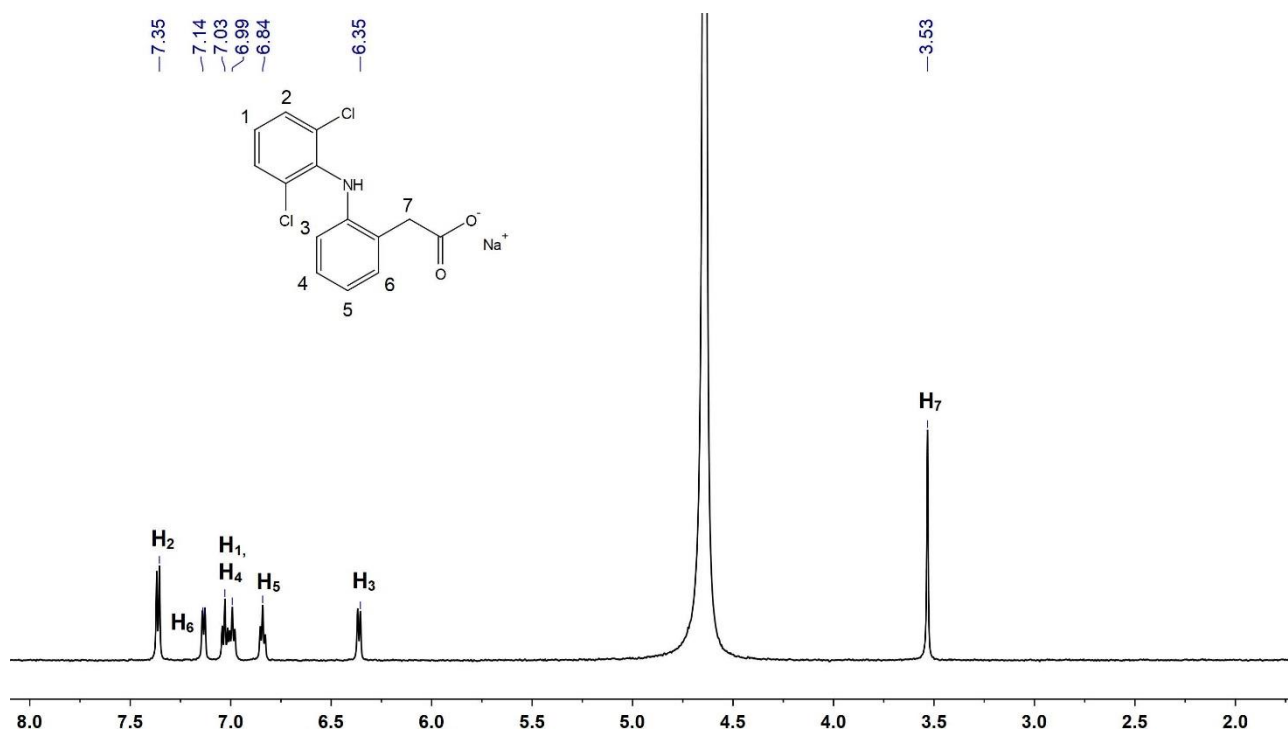

Figure S2.  $^1\text{H}$  NMR (600 MHz,  $\text{D}_2\text{O}$ , pH 7.4, 298 K) spectrum of DCF (2 mM).

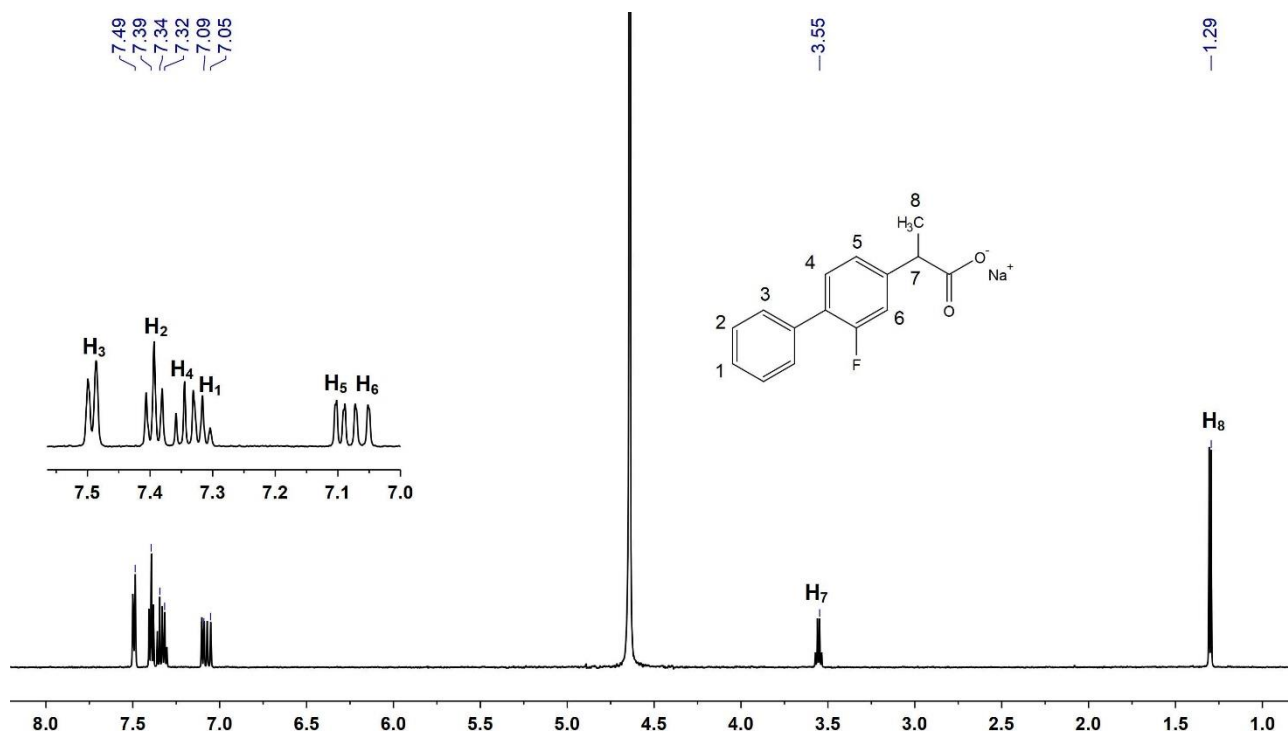

Figure S3.  $^1\text{H}$  NMR (600 MHz,  $\text{D}_2\text{O}$ , pH 7.4, 298 K) spectrum of FBP (2 mM).

Table S1.  $^1\text{H}$  mono-selective relaxation rates ( $R_1^{\text{ms}}$ ,  $\text{s}^{-1}$ ) (600 MHz, 25  $^\circ\text{C}$ ,  $\text{D}_2\text{O}$ , pH = 7.4) of some protons of KTR (2 mM) alone and in mixtures with HSA at different molar ratios.

| [HSA] (mg/mL) | H <sub>1</sub> | H <sub>4</sub> | H <sub>5</sub> | H <sub>6</sub> | H <sub>7</sub> | H <sub>7'</sub> | H <sub>8</sub> | H <sub>8'</sub> |
|---------------|----------------|----------------|----------------|----------------|----------------|-----------------|----------------|-----------------|
|               | 0.26           | 0.31           | 0.21           | 0.28           | 0.81           | 0.74            | 0.79           | 0.92            |
| 0.1           | 0.57           | 0.50           | 0.44           | 0.51           | 1.41           | 1.43            | 1.39           | 1.72            |
| 0.5           | 1.18           | 1.18           | 0.94           | 1.10           | 2.78           | 2.78            | 2.63           | 2.86            |
| 1.0           | 1.82           | 1.89           | 1.33           | 1.89           | 4.35           | 4.17            | 4.00           | 4.76            |
| 1.5           | 2.38           | 2.45           | 1.89           | 2.56           | 5.26           | 5.11            | 5.00           | 5.26            |

|     |      |      |      |      |      |      |      |      |
|-----|------|------|------|------|------|------|------|------|
| 2.0 | 3.03 | 2.86 | 2.27 | 2.94 | 6.25 | 5.56 | 5.88 | 6.67 |
|-----|------|------|------|------|------|------|------|------|

**Table S2.** Affinity indexes ( $[A^N]$ ,  $M^{-1}$ ) and corresponding standard errors ( $\epsilon$ ,  $M^{-1}$ ) calculated for KTR protons from NMR data.

| proton          | $[A^N]$ | $\epsilon$ |
|-----------------|---------|------------|
| H <sub>1</sub>  | 321195  | 8006       |
| H <sub>4</sub>  | 268550  | 20519      |
| H <sub>5</sub>  | 297606  | 12924      |
| H <sub>6</sub>  | 306718  | 20595      |
| H <sub>7</sub>  | 205002  | 16434      |
| H <sub>7'</sub> | 1953453 | 24511      |
| H <sub>8</sub>  | 196082  | 13144      |
| H <sub>8'</sub> | 183820  | 17154      |

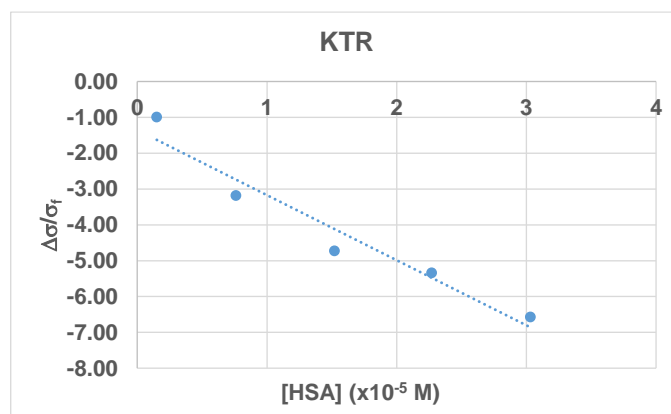

**Figure S4.**  $\Delta\sigma/\sigma_f$  of KTR (2 mM) plotted in function of HSA concentration.

**Table S3.**  $^1H$  mono-selective relaxation rates ( $R_1^{ms}$ ,  $s^{-1}$ ) (600 MHz, 25 °C, D<sub>2</sub>O, pH = 7.4) of some protons of DCF (2 mM) alone and in mixtures with HSA at different molar ratios

| [HSA] (mg/mL) | H <sub>2</sub> | H <sub>3</sub> | H <sub>5</sub> | H <sub>6</sub> | H <sub>7</sub> |
|---------------|----------------|----------------|----------------|----------------|----------------|
| 0             | 0.17           | 0.24           | 0.34           | 0.38           | 1.22           |
| 0.1           | 0.57           | 0.66           | 0.85           | 0.90           | 1.82           |
| 0.5           | 1.59           | 1.85           | 2.27           | 2.33           | 2.50           |
| 1.0           | 2.94           | 3.57           | 4.35           | 4.00           | 3.45           |
| 1.5           | 3.85           | 4.46           | 5.26           | 5.56           | 4.17           |
| 2.0           | 5.00           | 6.25           | 7.14           | 7.14           | 5.26           |

**Table S4.** Affinity indexes ( $[A^N]$ ,  $M^{-1}$ ) and corresponding standard errors ( $\epsilon$ ,  $M^{-1}$ ) calculated for DCF protons from NMR data.

| proton         | $[A^N]$ | $\epsilon$ |
|----------------|---------|------------|
| H <sub>2</sub> | 903885  | 33206      |
| H <sub>3</sub> | 803831  | 41542      |
| H <sub>5</sub> | 624295  | 38067      |
| H <sub>6</sub> | 563672  | 7629       |
| H <sub>7</sub> | 96571   | 3173       |

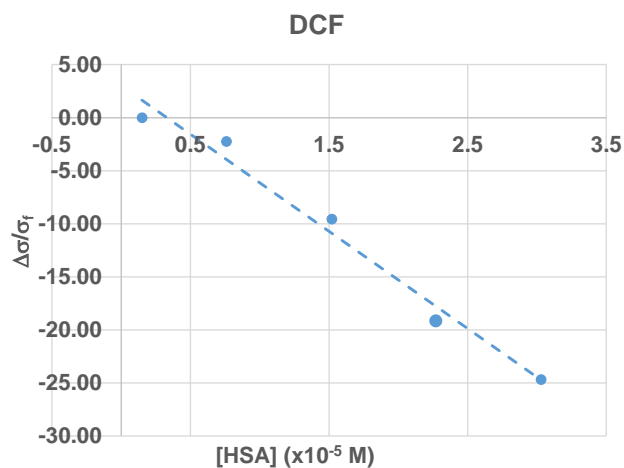

**Figure S5.**  $\Delta\sigma/\sigma_i$  of DCF (2 mM) plotted in function of HSA concentration.

**Table S5.**  $^1\text{H}$  mono-selective relaxation rates ( $R_1^{\text{ms}}$ ,  $\text{s}^{-1}$ ) (600 MHz, 25 °C,  $\text{D}_2\text{O}$ , pH = 7.4) of some protons of FBP (2 mM) alone and in mixtures with HSA at different molar ratios.

| [HSA] (mg/mL). | H <sub>3</sub> | H <sub>7</sub> | H <sub>8</sub> |
|----------------|----------------|----------------|----------------|
| 0              | 0.34           | 0.34           | 1.33           |
| 0.1            | 0.58           | 0.57           | 1.45           |
| 0.5            | 1.39           | 1.37           | 1.89           |
| 1.0            | 2.50           | 2.27           | 2.22           |
| 1.5            | 2.94           | 2.81           | 2.63           |
| 2.0            | 3.33           | 3.85           | 3.45           |

**Table S6.** Affinity indexes ( $[\text{A}^{\text{N}}]$ ,  $\text{M}^{-1}$ ) and corresponding standard errors ( $\epsilon$ ,  $\text{M}^{-1}$ ) calculated for FBP protons from NMR data.

| proton         | $[\text{A}^{\text{N}}]$ | $\epsilon$ |
|----------------|-------------------------|------------|
| H <sub>3</sub> | 281482                  | 37266      |
| H <sub>7</sub> | 327105                  | 16837      |
| H <sub>8</sub> | 48999                   | 4822       |
